# Supplementary material
Source: PubMed Central journal article supplement (PMC3286926)
Supplement: 1112515109_pnas.201112515SI.pdf [file 1112515109_pnas.201112515SI.pdf]

# Supporting Information

Koster and Tankersley 10.1073/pnas.1112515109

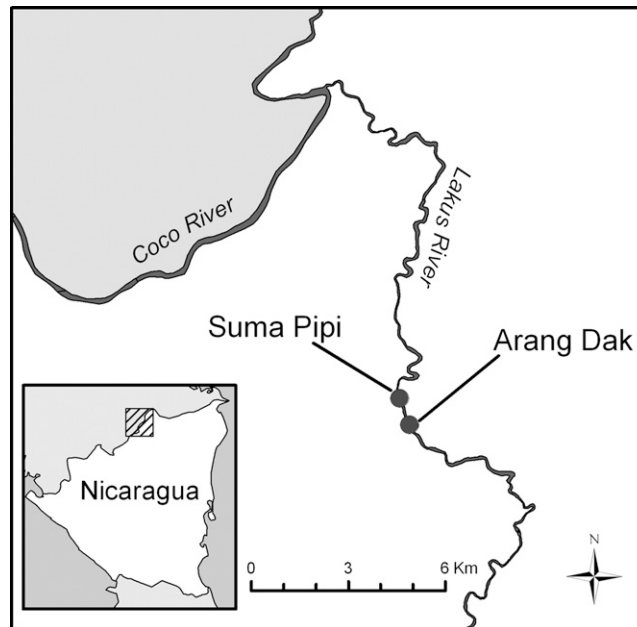

**Fig. S1.** Map of the study area. Although there are communities downstream of Suma Pipi and along the Coco River, there are no communities upstream of Arang Dak on the Lakus River.

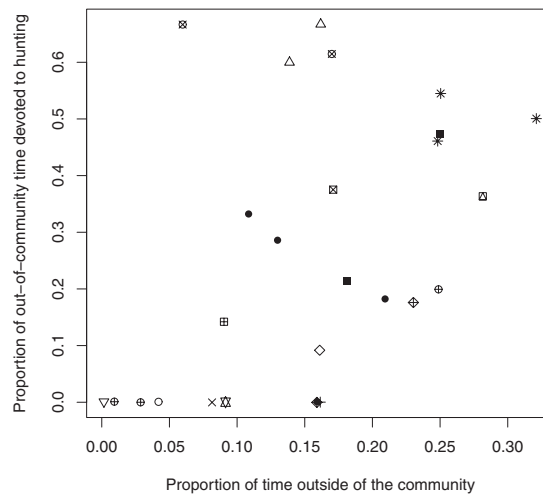

**Fig. S2.** A scatterplot of the relationship between the proportion of time that dogs were outside of the community and the proportion of that time (i.e., the observations outside the community) that was spent on planned hunting excursions. The points have been jittered to promote visualization. Dogs from the same household are represented with identical symbols.





## Other Supporting Information Files

[Dataset S1 \(RTF\)](#)

[Dataset S2 \(RTF\)](#)
